# Supplementary material for: Multifaceted effects of milk-exosomes (Mi-Exo) as a modulator of scar-free wound healing
Source: Royal Society of Chemistry journal article supplement (doi:10.1039/d0na00665c), 2020-11-30
Supplement: d0na00665c1.pdf [file d0na00665c1.pdf]

## Supporting Information

# **Multifaceted effects of Milk-Exosome (Mi-Exo) as a modulator of scar-free wound healing**

**Gna Ahn<sup>1</sup>, Yang-Hoon Kim<sup>\*1</sup> and Ji-Young Ahn<sup>\*1</sup>**

<sup>1</sup>School of Biological Sciences, Chungbuk National University, 1 Chungdae-Ro, Seowon-Gu, Cheongju 28644, South Korea

\*Correspondence should be addressed to Yang-Hoon Kim (kyh@chungbuk.ac.kr) and Ji-Young Ahn (jyahn@chungbuk.ac.kr)

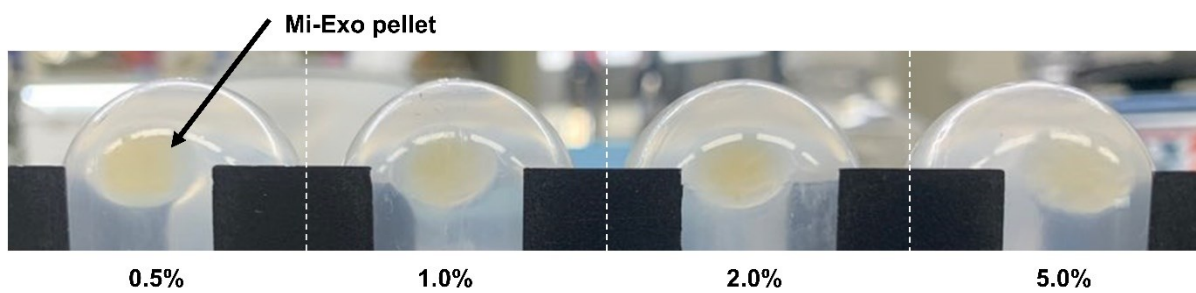

**Figure S1. Isolated Mi-Exo.** Mi-Exo pellet after ultra-centrifugation. pFtM was treated with range from 0.5 to 5.0 % acetic acid (AA).

**(A) Size distribution**

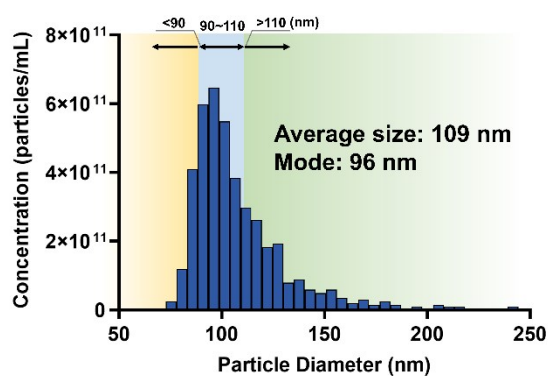

**(B) Particle flow rate**

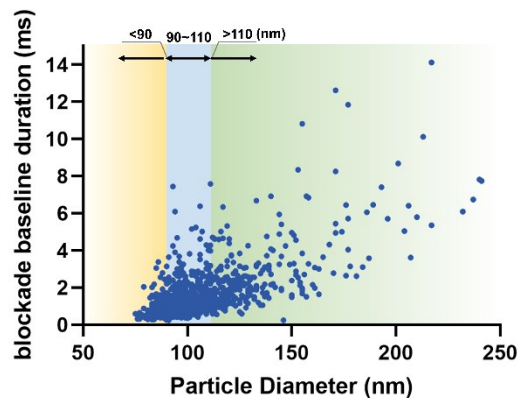

**Figure S2. Mi-Exo size properties.** (A) Size distribution of Mi-Exo. (B) blockade baseline duration (ms) by particle tracking analysis. Blockade baseline duration means flow rate of Mi-Exo particle.

(A) OMV Cryo-EM

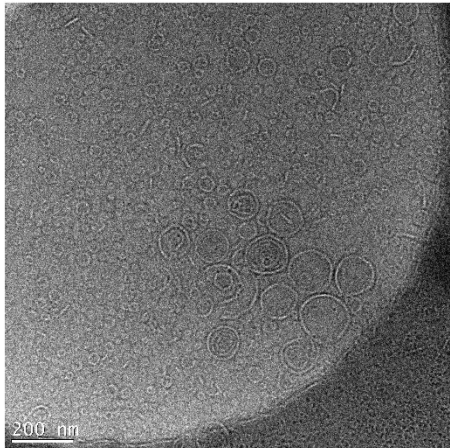

(B) OMV Size distribution

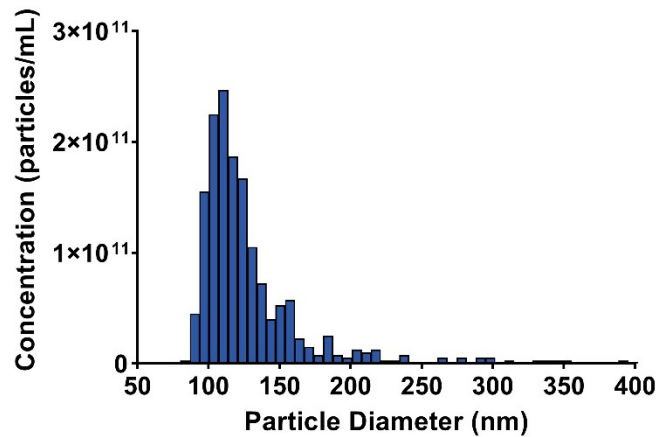

**Figure S3. Isolated bacterial OMV characterization.** (A) Cryo-EM image of OMV. OMVs also have typical sphere vesicle formed bi-lipid layer structure. (B) Size distribution of OMVs. *E. coli* BL21 (DE3) strain was cultured to 500 mL in 2 L flask (200 rpm, 1 day, 25 °C). Next, cultured bacteria sample was centrifuged 3,000 rpm, 30 min, 4 °C, and supernatant filtered by using (0.45 and 0.22)  $\mu\text{m}$  bottle-top vacuum filter. Filtered supernatant was centrifuged at  $200,000 \times g$  for 2 h at 4 °C, and washed with 10 mM DPBS under the same condition. OMV pellet was dispersed in 10 mM PBS buffer, and left overnight at 4 °C. The final products were used in this study.

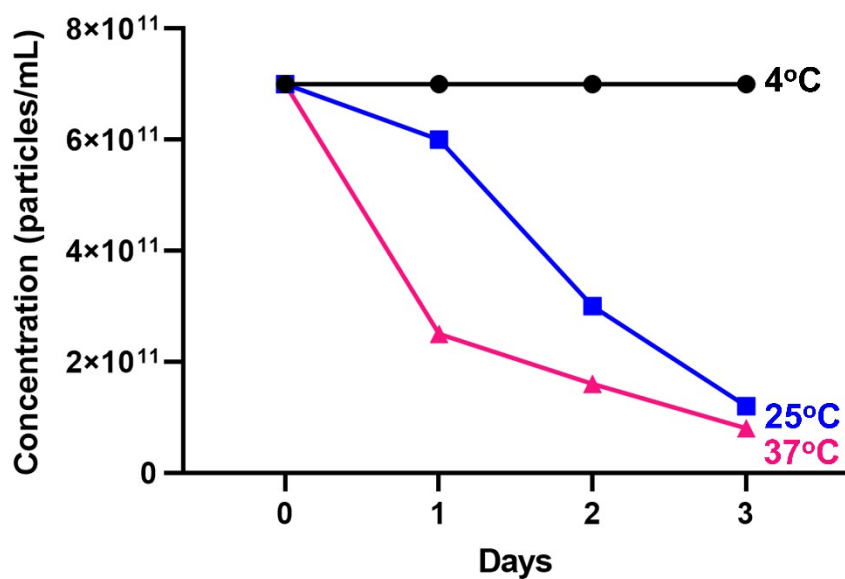

**Figure S4. Stability test.** Mi-Exo stored at three different temperatures of 4 °C, 25 °C, and 37 °C. There were no significant differences between particle concentrations at 4 °C, after day 3. However, at 25 and 37 °C, there were a significant decrease in the NP Mi-Exo decreasing from 14.3 – 64.3% at day 1 to 82.9 – 88.6% after day 3, respectively. NP: number of particles.

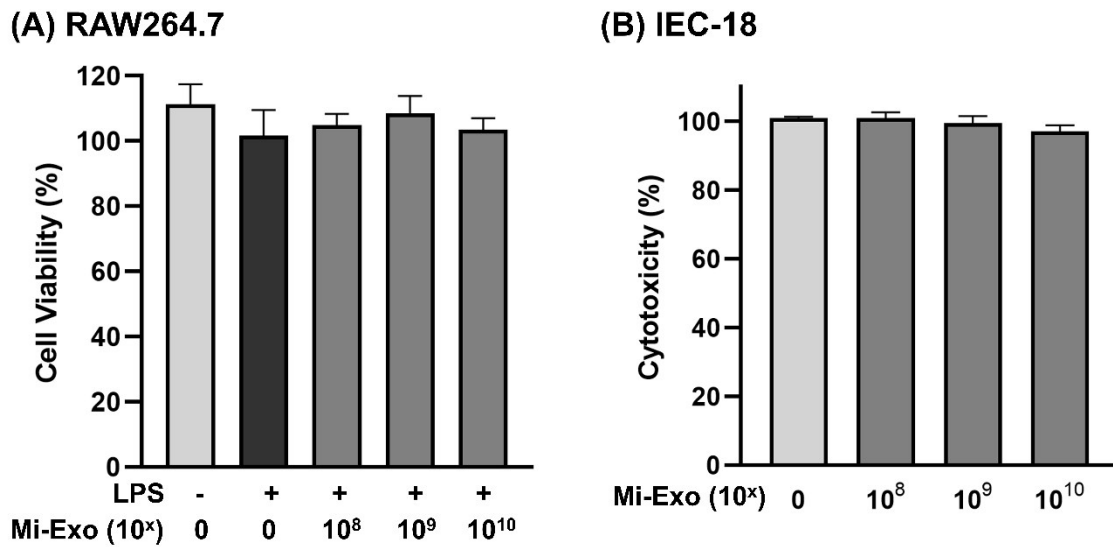

**Figure S5. Cell viability of RAW264.7 and IEC-18 cells.** (A) Cell viability of RAW264.7 cell. Although LPS treatment showed a tendency to decrease slightly, compared to the untreated group, this did not significantly affect the experiment. (B) Cell viability of the IEC-18 cell. All results were measured in triplicate. For the cytotoxicity of Mi-Exo, RAW264.7 and IEC-18 cells were seeded into 96-well plate ( $3 \times 10^5$  cells/well), and incubated for 24 h. Then, Mi-Exo was added to plate, and further incubated for 24 h. The cells were then washed with DPBS. Cytotoxicity was measured by Cell Counting Kit-8 (Dojindo, Kumamoto, Japan), and the procedure was performed by manual protocol. Reading absorbance used ELISA plate reader.

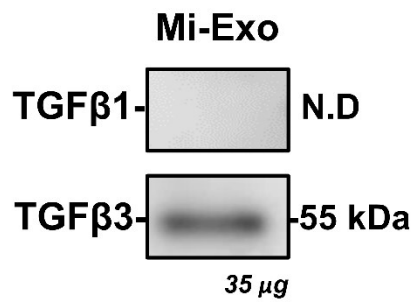

**Figure S6. TGFβ1 and TGFβ3 in Mi-Exo.** The protein level of TGF-β1 and TGF-β3 in Mi-Exo was analyzed by Western blot. The entire experimental procedure is described in 2.2.

**Table S1. MicroRNA primer list used in this study.**

| <b>Primer</b>           | <b>Sequence (5'-3')</b>                                 | <b>Reference</b>      |
|-------------------------|---------------------------------------------------------|-----------------------|
| <b>Adaptor primer</b>   | GCGAGCACAGAATTAATACGACTCACTATA<br>GGTTTTTTTTTTTTTTTTTTT | 1                     |
| <b>Bta-miR-2478</b>     | GTATCCCACTTCTGACACCA                                    | miR Base <sup>a</sup> |
| <b>Universal primer</b> | GCGAGCACAGAATTAATACGAC                                  | 1                     |

<sup>a</sup>Bta-miR sequence information can be found at the miR Base web site

(<http://www.mirbase.org/>).



**Table S2. Cytokine primer list used in this study.**

| Species | Primer        | Sequence (5'-3')                   | Reference |
|---------|---------------|------------------------------------|-----------|
| Mouse   | TNF $\alpha$  | F CCACCACGCTCTTCTGTCTAC            | 2         |
|         |               | R AGGGTCTGGGCCATAGAACT             |           |
|         | IL-6          | F GCTACCAAACCTGGATATAATCAGGA       | 3         |
|         |               | R CCAGGTAGCTATGGTACTCCAGAA         |           |
|         | iNOS          | F TCTTTGACGCTCGGAACTGT             | 4         |
|         |               | R CCATGATGGTCACATTCTGC             |           |
|         | COX2          | F AGCCCACCCCAAACACAGT              | 5         |
|         |               | R AAATATGATCTGGATGTCAGCACATA<br>TT |           |
|         | Actin         | F GTGGGCCGCTCTAGGCACCAA            | 6         |
|         |               | R CTCTTTGATGTCACGCACGATTTC         |           |
|         | TGF $\beta$ 1 | F GTGTGGAGCAACATGTGGAACCTCTA       | 7         |
|         |               | R TTGGTTCAGCCACTGCCGTA             |           |
|         | TGF $\beta$ 3 | F GCTCTTCCAGATACTTCGAC             | 8         |
|         |               | R AGCAGTTCTCCTCCAGGTTG             |           |

The Mi-Exo was pre-denatured at 95 °C for 3 min, followed by 45 cycles of denaturing at 95 °C for 15 s, annealing at 60 °C for 30 s, and extension at 72 °C for 30 s. Table S2 shows the primer list used for mRNA RT-PCR.

## Reference

1. D. Zheng, S. Haddadin, Y. Wang, L. Q. Gu, M. C. Perry, C. E. Freter and M. X. Wang, *Int J Clin Exp Pathol*, 2011, **4**, 575-586.
2. K. Ogino, R. Zhang, H. Takahashi, K. Takemoto, M. Kubo, I. Murakami, D. H. Wang and Y. Fujikura, *PLoS One*, 2014, **9**, e92710.
3. M. Zhang, C. Wang, J. Wu, X. Ha, Y. Deng, X. Zhang, J. Wang, K. Chen, J. Feng, J. Zhu, J. Xie and J. Zhang, *Mediators Inflamm*, 2018, **2018**, 1756494.
4. J. S. Hwang, K. H. Kim, J. Park, S. M. Kim, H. Cho, Y. Lee and I. O. Han, *J Biol Chem*, 2019, **294**, 608-622.
5. E. Javorkova, P. Trosan, A. Zajicova, M. Krulova, M. Hajkova and V. Holan, *Stem Cells Dev*, 2014, **23**, 2490-2500.
6. Y. W. Lin, C. Slape, Z. Zhang and P. D. Aplan, *Blood*, 2005, **106**, 287-295.
7. T. Tsumuraya, H. Ohtaki, D. Song, A. Sato, J. Watanabe, Y. Hiraizumi, T. Nakamachi, Z. Xu, K. Dohi, H. Hashimoto, T. Atsumi and S. Shioda, *J Neuroinflammation*, 2015, **12**, 35.
8. T. W. Gilbert, A. M. Stewart-Akers, J. Sydeski, T. D. Nguyen, S. F. Badylak and S. L. Woo, *Tissue Eng*, 2007, **13**, 1313-1323.
